# Supplementary material
Source: publisher figshare collection journal article supplement (https://aacr.figshare.com/articles/dataset/_/22758837)
Supplement: Supplementary file 1 [file 40438221]

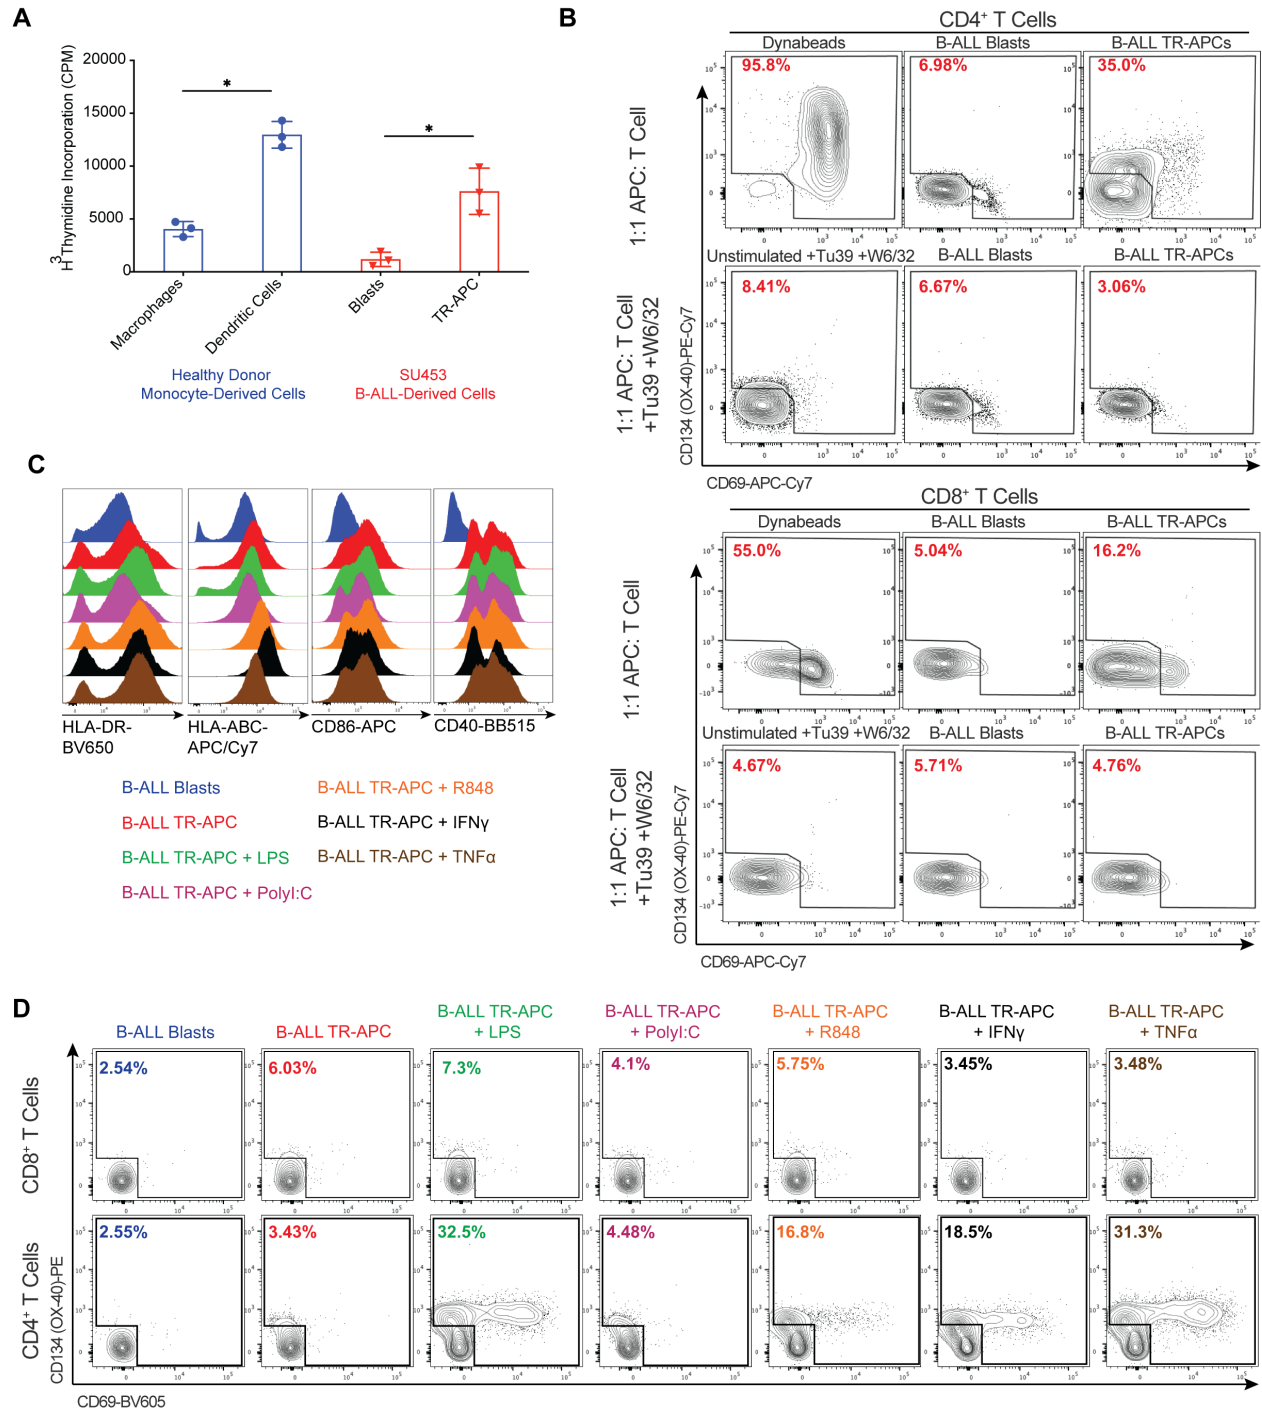

**Supplemental Figure S10: Primary B-ALL-derived TR-APCs activate T cells in an MHC-restricted manner according to the inflammatory milieu. A, Tritiated thymidine incorporation by proliferating allogeneic T cells co-cultured with SU453 B-ALL-derived TR-APCs. TR-APCs were generated from FACS purified SU453 B-ALL blasts cultured in the presence of M-CSF, GM-**

CSF, IL-3, FLT3L, and IL-7 for 14 days. Primary macrophages and dendritic cells were generated from peripheral blood monocytes isolated from the peripheral blood of n=3 healthy donors. Primary macrophages, dendritic cells, blasts, and TR-APCs were irradiated prior to co-culture with allogeneic T cells. Cultures were established at a ratio of 1:4 APCs: T cells. **B**, Surface expression of activation markers on T cells from SU893 primary specimen co-cultured with autologous B-ALL TR-APCs generated with M-CSF, GM-CSF, and IL-3, as in **Figure 6E** at a 1:1 ratio in the presence or absence of Tu39 and W6/32 antibodies to block MHC-I and MHC-II. Activated T cells shown as a percentage of live T cells **C**, Surface expression of antigen presentation and co-stimulatory molecules on TR-APCs derived from SU453 B-ALL blasts and activated with the indicated inflammatory stimuli. **D**, Surface expression of activation markers on SU453 T cells co-cultured with autologous TR-APCs stimulated with the indicated inflammatory stimuli. Activated T cells shown as a percentage of live CD4<sup>+</sup> or CD8<sup>+</sup> T cells. *P* values were calculated with two-tailed *t*-tests. n=3 replicates/group. \**P* ≤ 0.05.
